# Supplementary material for: Institutional Mechanisms and Systemic Bottlenecks in the Implementation of Innovative Medical Devices: A Case Study of Shanghai
Source: Research Square preprint supplement (doi:10.21203/rs.3.rs-8476355/v1), 2026-02-17
Supplement: Supplementary file 1 [file fe0b3a2623fd86bf730ca338.docx]

**Supplementary file 1: Interview questions**

1. What are the main barriers to achieving “full and timely configuration” within one month for newly added consumables included in the Innovative Medical Device Catalogue?

(For example, are the obstacles mainly related to tendering procedures, price negotiations, supplier qualification, or hospital inventory and budget constraints?)

2. Under the current hospital consumables SPD (Supply, Processing, and Distribution) management model, what challenges does the introduction of “innovative drugs and medical devices”—particularly high-value consumables with unstable or unpredictable utilization—pose to inventory management and cost control?

3. Do you consider it necessary to establish a “green-channel” procurement process for innovative drugs and medical devices that is distinct from conventional consumables?

If so, how should the core components of such a process be designed?

4. Has the current policy of excluding data related to “innovative medical devices” from assessment indicators such as average cost per case effectively reduced the pressure on medical device procurement departments?

In practice, is the data segregation process clear and operationally convenient?

5. If the scope of the “assessment-exemption” pilot were expanded (for example, to cover a wider range of innovative consumables or to allow longer exemption periods), what impact do you anticipate this would have on hospital consumables cost control and refined management practices?

6. From a procurement perspective, what factors should be primarily considered when determining whether a consumable product should be included in the “assessment-exemption” pilot?

(For example: product price, clinical value, scale of patient benefit, clinical department of use, etc.)
